# Supplementary material for: Realizing superior energy storage properties in lead-free ceramics via a macro-structure design strategy
Source: Royal Society of Chemistry journal article supplement (doi:10.1039/d0ta03526b), 2020-01-01
Supplement: d0ta03526b1.pdf [file d0ta03526b1.pdf]

## **Electronic Supplementary Information**

### **Realizing superior energy storage properties in lead-free ceramics via macro-structure design strategy**

Fei Yan, Hairui Bai, Xiaofeng Zhou, Guanglong Ge, Guohui Li, Bo Shen, Jiwei Zhai\*

Shanghai Key Laboratory for R&D and Application of Metallic Functional Materials,  
Functional Materials Research Laboratory, School of Materials Science and  
Engineering, Tongji University, Shanghai 201804, China

\***Corresponding author:** Jiwei Zhai. E-mail address: apzhai@tongji.edu.cn

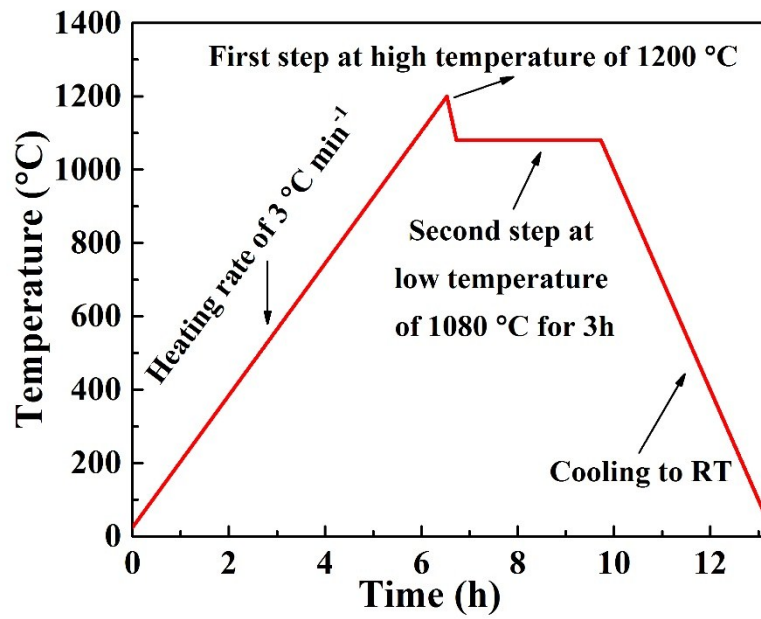

Figure S1 Schematic drawing of the two step sintering method

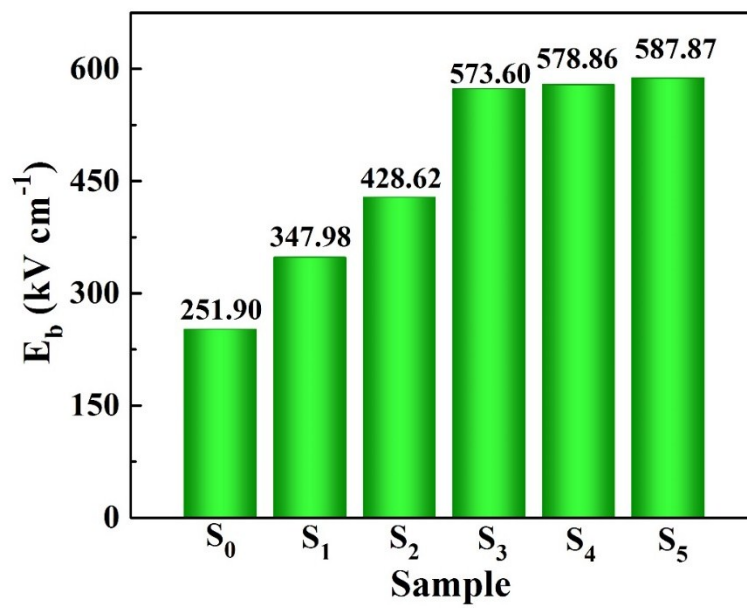

Figure S2 Electric breakdown strength of the  $S_0$ - $S_5$

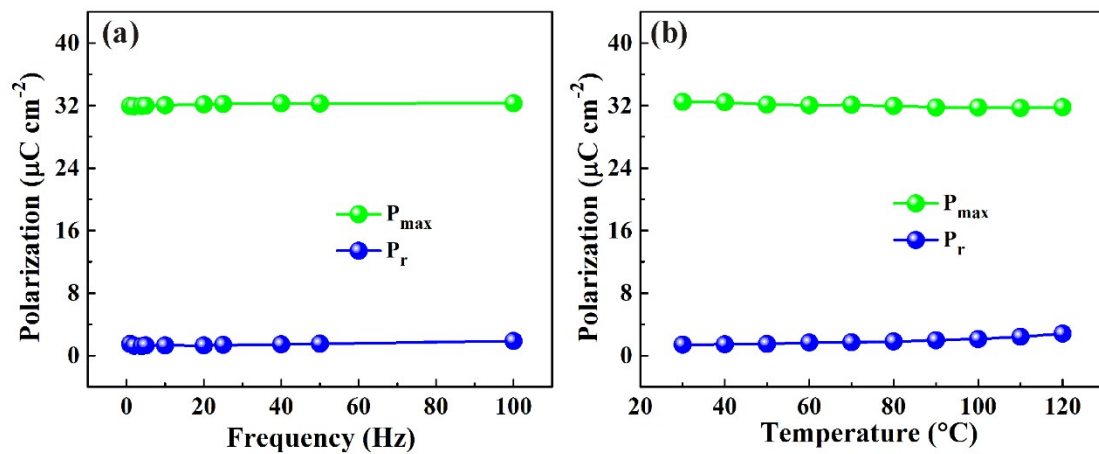

Figure S3(a) Frequency and (b) temperature dependent  $P_{\max}$  and  $P_r$  of the  $S_3$  at 300 kV

$\text{cm}^{-1}$
